# Supplementary material for: Trends of Clinical Outcomes and Health Care Resource Use in Heart Failure in the United States
Source: PubMed Central journal article supplement — J Am Heart Assoc. 2020 Jul 4;9(14):e016782. doi: 10.1161/JAHA.120.016782 (PMC7660738; doi:10.1161/jaha.120.016782), 2020-07-04
Supplement: JAH3-9-e016782-s001.pdf [file JAH3-9-e016782-s001.pdf]

# **Supplemental Material**

**Table S1. The International Classification of Diseases (ICD)-Clinical Modification (CM) codes for acute heart failure.**

|                 |                                                    |
|-----------------|----------------------------------------------------|
| ICD-9 CM codes  | 428.21, 428.23, 428.31, 428.33, 428.41, 428.43     |
| ICD-10-CM codes | I50.21, I50.23, I50.31, I50.33, I50.41 and I50.43. |

**Table S2. The International Classification of Diseases (ICD)-Clinical Modification (CM) codes for Elixhauser Comorbidities.**

| Comorbidities                   | Elixhauser's original ICD-9-CM                                                                                                     | Elixhauser AHRQ-Web ICD-9-CM                                                                                  | ICD-10                                                                                                                    | Enhanced ICD-9-CM                                                                                                                       |
|---------------------------------|------------------------------------------------------------------------------------------------------------------------------------|---------------------------------------------------------------------------------------------------------------|---------------------------------------------------------------------------------------------------------------------------|-----------------------------------------------------------------------------------------------------------------------------------------|
| Congestive heart failure        | 398.91, 402.11, 402.91, 404.11, 404.13, 404.91, 404.93, 428.x                                                                      | 398.91, 402.01, 402.11, 402.91, 404.01, 404.03, 404.11, 404.13, 404.91, 404.93, 428.x                         | I09.9, I11.0, I13.0, I13.2, I25.5, I42.0, I42.5-I42.9, I43.x, I50.x, P29.0                                                | 398.91, 402.01, 402.11, 402.91, 404.01, 404.03, 404.11, 404.13, 404.91, 404.93, 425.4-425.9, 428.x                                      |
| Cardiac arrhythmias             | 426.10, 426.11, 426.13, 426.2-426.53, 426.6-426.8, 427.0, 427.2, 427.31, 427.60, 427.9, 785.0, V45.0, V53.3                        |                                                                                                               | I44.1-I44.3, I45.6, I45.9, I47.x-I49.x, ROO.O, ROO.1, ROO.8, T82.1, Z45.0, Z95.0                                          | 426.0, 426.13, 426.7, 426.9, 426.10, 426.12, 427.0-427.4, 427.6-427.9, 785.0, 996.01, 996.04, V45.0, V53.3                              |
| Valvular disease                | 093.2, 394.0-397.1, 424.0-424.91, 746.3-746.6, V42.2, V43.3                                                                        | 093.2, 394.x-397.1, 397.9, 424.x, 746.3-746.6, V42.2, V43.3                                                   | A52.0, I05.x-I08.x, I09.1, I09.8, I34.x-I39.x, Q23.O-Q23.3, Z95.2, Z95.4                                                  | 093.2, 394.x-397.x, 424.x, 746.3-746.6, V42.2, V43.3                                                                                    |
| Pulmonary circulation Disorders | 416.x, 417.9                                                                                                                       | 416.x, 417.9                                                                                                  | I26.x, I27.x, I28.0, I28.8, I28.9                                                                                         | 415.0, 415.1, 416.x, 417.0, 417.8, 417.9                                                                                                |
| Peripheral vascular disorders   | 440.x, 441.2, 441.4, 441.7, 441.9, 443.1-443.9, 447.1, 557.1, 557.9, V43.4                                                         | 440.x, 441.x, 442.x, 443.1-443.9, 447.1, 557.1, 557.9, V43.4                                                  | I70.x, I71.x, I73.1, I73.8, I73.9, I77.1, I79.0, I79.2, K55.1, K55.8, K55.9, Z95.8, Z95.9                                 | 093.0, 437.3, 440.x, 441.x, 443.1-443.9, 447.1, 557.1, 557.9, V43.4                                                                     |
| Hypertension, uncomplicated     | 401.1, 401.9                                                                                                                       | 401.1, 401.9, 642.0                                                                                           | I10.x                                                                                                                     | 401.x                                                                                                                                   |
| Hypertension, complicated       | 402.10, 402.90, 404.10, 404.90, 405.1, 405.9                                                                                       | 401.0, 402.x-405.x, 642.1, 642.2, 642.7, 642.9                                                                | I11.x-I13.x, I15.x                                                                                                        | 402.x-405.x                                                                                                                             |
| Paralysis                       | 342.0, 342.1, 342.9-344.x                                                                                                          | 342.x-344.x, 438.2-438.5                                                                                      | G04.1, G11.4, G80.1, G80.2, G81.x, G82.x, G83.0-G83.4, G83.9                                                              | 334.1, 342.x, 343.x, 344.0-344.6, 344.9                                                                                                 |
| Other neurological disorders    | 331.9, 332.0, 333.4, 333.5, 334.x, 335.x, 340.x, 341.1-341.9, 345.0, 345.1, 345.4, 345.5, 345.8, 345.9, 348.1, 348.3, 780.3, 784.3 | 330.x-331.x, 332.0, 333.4, 333.5, 334.x, 335.x, 340, 341.1-341.9, 345.x, 347.x, 780.3, 784.3                  | G10.x-G13.x, G20.x-G22.x, G25.4, G25.5, G31.2, G31.8, G31.9, G32.x, G35.x-G37.x, G40.x, G41.x, G93.1, G93.4, R47.0, R56.x | 331.9, 332.0, 332.1, 333.4, 333.5, 333.92, 334.x-335.x, 336.2, 340.x, 341.x, 345.x, 348.1, 348.3, 780.3, 784.3                          |
| Chronic pulmonary disease       | 490-492.8, 493.00-493.91, 494.x-505.x, 506.4                                                                                       | 490x-492.x, 493.x, 494x-505.x, 506.4                                                                          | I27.8, I27.9, J40.x-J47.x, J60.x-J67.x, J68.4, J70.1, J70.3                                                               | 416.8, 416.9, 490.x-505.x, 506.4, 508.1, 508.8                                                                                          |
| Diabetes, uncomplicated         | 250.0-250.3                                                                                                                        | 250.0-250.3, 648.0                                                                                            | E10.0, E10.1, E10.9, E11.0, E11.1, E11.9, E12.0, E12.1, E12.9, E13.0, E13.1, E13.9, E14.0, E14.1, E14.9                   | 250.0-250.3                                                                                                                             |
| Diabetes, complicated           | 250.4-250.7, 250.9                                                                                                                 | 250.4-250.9, 775.1                                                                                            | E10.2-E10.8, E11.2-E11.8, E12.2-E12.8, E13.2-E13.8, E14.2-E14.8                                                           | 250.4-250.9                                                                                                                             |
| Renal failure                   | 403.11, 403.91, 404.12, 404.92, 585.x, 586.x, V42.0, V45.1, V56.0, V56.8                                                           | 403.01, 403.11, 403.91, 404.02, 404.03, 404.12, 404.13, 404.92, 404.93, 585.x, 586.x, V42.0, V45.1, V56.x     | I12.0, I13.1, N18.x, N19.x, N25.0, Z49.0-Z49.2, Z94.0, Z'99.2                                                             | 403.01, 403.11, 403.91, 404.02, 404.03, 404.12, 404.13, 404.92, 404.93, 585.x, 586.x, 588.0, V42.0, V45.1, V56.x                        |
| Liver disease                   | 070.32, 070.33, 070.54, 456.0, 456.1, 456.2, 571.0, 571.2-571.9, 572.3, 572.8, V42.7                                               | 070.22, 070.23, 070.32, 070.33, 070.44, 070.54, 456.0, 456.1, 456.20, 571.0, 571.2-571.9, 572.3, 572.8, V42.7 | B18.x, I85.x, I86.4, I98.2, K70.x, K71.1, K71.3-K71.5, K71.7, K72.x-K74.x, K76.0, K76.2-K76.9, Z94.4                      | 070.22, 070.23, 070.32, 070.33, 070.44, 070.54, 070.6, 070.9, 456.0-456.2, 570.x, 571.x, 572.2-572.8, 573.3, 573.4, 573.8, 573.9, V42.7 |

**Table S3. List of Variables Used for Adjustments.**

|                                 |                                                                                                                                                                                                                                                                                                                                                                                                                                                                                                                                                                                                                                                                                                                                                                                                                                                                                                                                                                                                                                                 |
|---------------------------------|-------------------------------------------------------------------------------------------------------------------------------------------------------------------------------------------------------------------------------------------------------------------------------------------------------------------------------------------------------------------------------------------------------------------------------------------------------------------------------------------------------------------------------------------------------------------------------------------------------------------------------------------------------------------------------------------------------------------------------------------------------------------------------------------------------------------------------------------------------------------------------------------------------------------------------------------------------------------------------------------------------------------------------------------------|
| <p>Elixhauser Comorbidities</p> | <ol style="list-style-type: none"> <li>1. Valvular disease</li> <li>2. Pulmonary Circulation disorders</li> <li>3. Peripheral vascular disease</li> <li>4. Hypertension (combine uncomplicated and complicated)</li> <li>5. Paralysis</li> <li>6. Neurological disorders</li> <li>7. Chronic pulmonary disease</li> <li>8. Diabetes without chronic complications</li> <li>9. Diabetes with chronic complications</li> <li>10. Hypothyroidism</li> <li>11. Renal failure</li> <li>12. Liver disease</li> <li>13. Chronic Peptic ulcer disease</li> <li>14. HIV and AIDS</li> <li>15. Lymphoma</li> <li>16. Metastatic cancer</li> <li>17. Solid tumor without metastasis</li> <li>18. Rheumatoid arthritis/collagen vascular diseases</li> <li>19. Coagulation deficiency</li> <li>20. Obesity</li> <li>21. Weight loss</li> <li>22. Fluid and electrolyte disorders</li> <li>23. Blood loss anemia</li> <li>24. Deficiency anemia</li> <li>25. Alcohol Abuse</li> <li>26. Drug Abuse</li> <li>27. Psychosis</li> <li>28. Depression</li> </ol> |
| <p>Demographic variables</p>    | <p>A. Age, gender, race, income (quartile classification of the estimated median household income of residents in the patient's ZIP Code) and urban or rural hospitalization</p>                                                                                                                                                                                                                                                                                                                                                                                                                                                                                                                                                                                                                                                                                                                                                                                                                                                                |

**Table S4. Complications and Utilization of Procedures in Patients with Heart Failure.**

| <b>Variable, No. (%)</b>                            | <b>2002-2006<br/>(n=297112)</b> | <b>2007-2011<br/>(n=4039603)</b> | <b>2012-2016<br/>(n=7469964)</b> | <b>P-value</b> |
|-----------------------------------------------------|---------------------------------|----------------------------------|----------------------------------|----------------|
| <b>Cardiac Procedures/Complications</b>             |                                 |                                  |                                  |                |
| Echocardiogram                                      | 22372 (7.5)                     | 297286 (7.4)                     | 581835 (7.8)                     | <0.001         |
| Left Heart Catheterization                          | 32449 (10.9)                    | 408866 (10.1)                    | 790280 (10.6)                    | <0.001         |
| Right Heart Catheterization                         | 1949 (0.7)                      | 44132 (1.1)                      | 124125 (1.7)                     | <0.001         |
| Percutaneous Coronary Intervention                  | 7503 (2.5)                      | 113464 (2.8)                     | 235220 (3.1)                     | <0.001         |
| Coronary Artery Bypass Graft                        | 3842 (1.3)                      | 61599 (1.5)                      | 112385 (1.5)                     | <0.001         |
| Left Ventricular Assist Device                      | 294 (0.1)                       | 6347 (0.2)                       | 17275 (0.2)                      | <0.001         |
| Automatic Implantable Cardioverter<br>Defibrillator | 4779 (1.6)                      | 56604 (1.4)                      | 107175 (1.4)                     | <0.001         |
| Acute Myocardial Infarction                         | 8051 (2.7)                      | 101578 (2.5)                     | 152505 (2.0)                     | <0.001         |
| Cardiogenic Shock                                   | 3749 (1.3)                      | 81828 (2.0)                      | 230825 (3.1)                     | <0.001         |
| Percutaneous Ventricular Assist Device              | -                               | 2416 (0.1)                       | 15240 (0.2)                      | <0.001         |
| Intra-Aortic Balloon Pump                           | 2346 (0.8)                      | 38674 (1.0)                      | 71710 (1.0)                      | <0.001         |
| Cardiopulmonary Resuscitation                       | 2195 (0.7)                      | 33822 (0.8)                      | 78645 (1.1)                      | <0.001         |
| Ventilator                                          | 21408 (7.2)                     | 271831 (6.7)                     | 564200 (7.6)                     | <0.001         |
| Tracheostomy                                        | 2116 (0.7)                      | 24263 (0.6)                      | 46485 (0.6)                      | <0.001         |
| <b>Non-Cardiac Procedures/Complications</b>         |                                 |                                  |                                  |                |
| Dialysis                                            | 4475 (1.5)                      | 211227 (5.2)                     | 436575 (5.8)                     | <0.001         |
| Percutaneous Endoscopic Gastrostomy                 | 2557 (0.9)                      | 47189 (1.2)                      | 87275 (1.2)                      | <0.001         |
| Vasopressors                                        | 1266 (0.4)                      | 29996 (0.7)                      | 79660 (1.1)                      | <0.001         |
| Extra Corporeal Membrane Oxygenation                | 2981(1.0)                       | 46080 (1.1)                      | 45590 (0.6)                      | <0.001         |
| Blood transfusion                                   | 28508 (9.6)                     | 458190 (11.3)                    | 673250 (9.0)                     | <0.001         |
